# Supplementary material
Source: PubMed Central journal article supplement (PMC3100590)
Supplement: NIHMS290427-supplement-1_si_001.pdf [file NIHMS290427-supplement-1_si_001.pdf]

## *Supporting Information*

### ***N*-(3-Fluoro-4-(4-(2-methoxy or 2,3-dichlorophenyl) piperazine-1-yl)-butyl)-aryl carboxamides as Selective Dopamine D3 Receptor Ligands: Critical Role of the Carboxamide Linker for D3 Receptor Selectivity**

*Ashwini K. Banala,<sup>†</sup> Benjamin A. Levy,<sup>†</sup> Sameer S. Khatri,<sup>†‡</sup> Cheryse A. Furman<sup>^</sup>,  
Rebecca A. Roof<sup>^</sup>, Yogesh Mishra, Suzy A. Griffin,<sup>‡</sup> David R. Sibley,<sup>^</sup> Robert R.  
Luedtke,<sup>‡</sup> Amy Hauck Newman<sup>†\*</sup>*

<sup>†</sup>Medicinal Chemistry Section, National Institute on Drug Abuse – Intramural Research Program, National Institutes of Health, 333 Cassell Drive, Baltimore, MD 21224

<sup>‡</sup>Department of Pharmacology and Neuroscience, University of North Texas Health Science Center, Fort Worth, TX 76107

<sup>^</sup> *Molecular Neuropharmacology Section, National Institute on Neurological Disorders & Stroke*, National Institutes of Health, 5625 Fishers Lane, Rockville, MD 20852

#### **Supplemental information Contents:**

- I. Table S1. Microanalysis Data.....S2**
- II. Table S2. Amino Acid Sequence Transition Points for the Chimeric Receptor Proteins.....S3**
- III. Table S3. Amino Acid Sequence of Wild type and Chimeric Human D3/D2 Dopamine Receptors.....S3-S6**

**Table S1: Microanalysis Data:**

| Compd      | C          | H    | N     | C     | H    | N     |
|------------|------------|------|-------|-------|------|-------|
|            | Calculated |      |       | Found |      |       |
| <b>8a</b>  | 62.02      | 6.10 | 9.98  | 62.02 | 5.94 | 9.97  |
| <b>8b</b>  | 62.28      | 5.43 | 11.17 | 61.99 | 5.38 | 11.08 |
| <b>8c</b>  | 59.53      | 5.96 | 8.01  | 59.71 | 5.76 | 8.04  |
| <b>8d</b>  | 59.03      | 5.26 | 8.98  | 59.04 | 4.98 | 8.78  |
| <b>8e</b>  | 64.64      | 6.73 | 9.05  | 64.63 | 6.49 | 9.01  |
| <b>8f</b>  | 52.23      | 4.97 | 7.03  | 52.17 | 4.66 | 6.99  |
| <b>8g</b>  | 67.19      | 6.93 | 13.06 | 67.05 | 6.86 | 13.01 |
| <b>8h</b>  | 54.26      | 4.92 | 10.12 | 54.07 | 4.97 | 10.06 |
| <b>8i</b>  | 73.55      | 6.81 | 8.87  | 73.60 | 6.80 | 8.76  |
| <b>8j</b>  | 59.81      | 5.02 | 6.97  | 59.54 | 4.95 | 6.91  |
| <b>8k</b>  | 58.74      | 5.69 | 7.90  | 58.67 | 5.52 | 7.94  |
| <b>8l</b>  | 52.64      | 4.59 | 7.37  | 52.39 | 4.52 | 7.25  |
| <b>8m</b>  | 57.64      | 6.27 | 9.96  | 57.61 | 6.08 | 9.87  |
| <b>8n</b>  | 52.71      | 5.10 | 9.46  | 52.86 | 4.99 | 9.47  |
| <b>8o</b>  | 56.55      | 5.10 | 7.33  | 56.89 | 4.91 | 7.28  |
| <b>13a</b> | 56.52      | 6.73 | 6.38  | 56.77 | 6.51 | 6.45  |
| <b>13b</b> | 53.73      | 5.56 | 6.27  | 53.48 | 5.60 | 6.28  |
| <b>13c</b> | 62.65      | 6.77 | 6.00  | 62.76 | 6.53 | 6.04  |
| <b>13d</b> | 59.07      | 5.95 | 5.90  | 59.04 | 5.89 | 5.90  |
| <b>13e</b> | 61.57      | 7.05 | 6.53  | 61.70 | 6.95 | 6.41  |
| <b>13f</b> | 54.47      | 5.82 | 5.78  | 54.40 | 5.60 | 5.62  |
| <b>14a</b> | 55.62      | 5.34 | 6.08  | 55.66 | 5.16 | 6.03  |
| <b>14b</b> | 56.64      | 5.05 | 6.19  | 56.87 | 5.00 | 6.29  |
| <b>15a</b> | 55.94      | 5.55 | 5.93  | 55.97 | 5.47 | 5.86  |
| <b>15b</b> | 55.43      | 5.43 | 5.88  | 55.36 | 5.24 | 5.83  |

**Table S2. Amino Acid Sequence Transition Points for the Chimeric Receptor Proteins**

|                       | <u>D3</u>         | <u>D2</u>         |                                    |
|-----------------------|-------------------|-------------------|------------------------------------|
| Chimera A             | MAVLKERALQ        | –                 | <i>TTTNYLIVSL</i>                  |
| Chimera B             | DVFTLDVMM         | –                 | <i>CTASILNLCA</i>                  |
| Chimera C             | NLCAISIDRY        | –                 | <i>TAVAMPMLYN</i>                  |
| Chimera D             | WVLAFAVSCP        | –                 | <i>LLFGLNNADQ</i>                  |
| Chimera E             | YLPFGVTVLV        | –                 | <i>YIKIYIVLRR</i>                  |
| Chimera F             | AFIVCWLPFF        | –                 | <i>ITHILNIHCD</i>                  |
|                       | <u>D2</u>         | <u>D3 E2 loop</u> | <u>D2</u>                          |
| Chimera D2/D3 E2 loop | <i>FTISCYLLFG</i> | –                 | FNTTGDPTVCSISN – <i>PAFVVYSSIV</i> |
|                       | <u>D3</u>         | <u>D2 E2 loop</u> | <u>D3</u>                          |
| Chimera D2/D2 E2 loop | FAVSCPLLEFG       | –                 | <i>LNNADQNECIAN</i> – PDFVIYSSV    |

*The transition points for the amino acid sequence of the chimeric receptor proteins are shown using the single letter amino acid code. Designated transition points correspond to the changes in the DNA sequence for the human D2 and D3 dopamine receptor genes. The corresponding D2 receptor amino acid sequence is shown in italics, while the D3 amino acid sequence is not italicized.*

**Table S3. Amino Acid Sequence of Wild type and Chimeric Human D3/D2 Dopamine Receptors**

**D2 Sequence**

**D3 Sequence**

**Human D2 Dopamine Receptor**

MDPLNLSWYDDDLERQNWSRPFNGSDGKA  
 DRPHYNYYATLLTLLIAVIVFGNVLVCM AVSREKALQTTT  
 NYLIVSLAVADLLVATLVMPWVVYLEVVG EWKFSRIHCDI  
 FVTLDVMMCTASILNLCAISIDRYTAVAMPMLYNTRYSSK  
 RRVTVMISIVWVLSFTISCP LLFGLNNADQNECIANPAF  
 VVYSSIVSFYVPFIVTLLVYIKIYIVLRRRRKR VNTKRSS  
 RAFRAHLRAPLKGNCTHPEDMKLCTVIMKSN GSFVNRRR  
 VEARRAQELEMELSSSTSPPERTRYSPIPPSHHQLTLPD  
 PSHHGLHSTPDSPAKPEKNGHAKDHPKIAKIFEIQTMPNG  
 KTRTSLKTMSSRRKLSQQKEKKATQMLAIVLGVFIICWLPF  
 FITHILNIHCD CNIPPVLYSAFTWLG YVNSAVNPIIYTTF  
 NIEFRKAFLKILHC

MASLSQLSSHLNYTCGAENSTGASQARPHAYYALSICALI  
LAIVFGNGLVCM AVLKERALQTTTNYLIVSLAVADLLVAT  
LVMPWVVYLEVVG EWKFSRIHCDIFVTL DVMMCTASILNL  
CAISIDRYTAVAMPMLYNTRYSSKRRVTVMISIVVLSFTI  
SCPLL FGLNNADQNECIANPAFVVYSSIVSFYVPFIVTLLV  
YIKIYIVLRRRRKR VNTKRSSRAFRAHLRAPLKGNC THPE  
DMKLCTVIMKSN GSFVNRRRVEAARRAQELEM EMLSSTS  
PPERTRYSP IPPSHHQLTLPDP SHHGLHSTPD SPAKPEKNG  
HAKDHPKIAKIFE IQTMPNGKTRTSLKTMSRRKLSQQKEK  
KATQMLAIVLGVFI ICWLPFFITHILNIHCDCNIPPVLYSAF  
TWLGYVNSAVNPIIYTTFNIEFRK AFLKILHC

### Chimera B (rtan12)

MASLSQLSSHLNYTCGAENSTGASQA  
RPHAYYALSICALILAIVFGNGLVCM AVLKERALQTTTNY  
LVVSLAVADLLVATLVMPWVVYLEVTGGVWNFSRICCDV  
FVTL DVMMCTASILNLCAISIDRYTAVAMPMLYNTRYSSKR  
RVTVMISIVVLSFTI SCPLL FGLNNADQNECIANPAFV  
VYSSIVSFYVPFIVTLLVYIKIYIVLRRRRKR VNTKRSSR  
AFRAHLRAPLKGNC THPE DMKLCTVIMKSN GSFVNRRRV  
EARRAQELEM EMLSSTSPPERTRYSP IPPSHHQLTLPDP  
SHHGLHSTPD SPAKPEKNGHAKDHPKIAKIFE IQTMPNGK  
TRTSLKTMSRRKLSQQKEKKATQMLAIVLGVFI ICWLPFF  
ITHILNIHCDCNIPPVLYSAFTW LGYVNSAVNPIIYTTFNIE  
FRK AFLKILHC

### Chimera C (rtan11)

MASLSQLSSHLNYTCGAENSTGASQARPHAYYALSICALI  
LAIVFGNGLVCM AVLKERALQTTTNYLVVSLAVADLLVAT  
LVMPWVVYLEVTGGVWNFSRICCDV FVTL DVMMCTASILN  
LCAISIDRYTAVAMPMLYNTRYSSKRRVTVMISIVVLSFTI  
ISCP LL FGLNNADQNECIANPAFVVYSSIVSFYVPFIVTLL  
VYIKIYIVLRRRRKR VNTKRSSRAFRAHLRAPLKGNC THP  
EDMKLCTVIMKSN GSFVNRRRVEAARRAQELEM EMLSST  
SPPERTRYSP IPPSHHQLTLPDP SHHGLHSTPD SPAKPEKN  
GHAKDHPKIAKIFE IQTMPNGKTRTSLKTMSRRKLSQQKE  
KKATQMLAIVLGVFI ICWLPFFITHILNIHCDCNIPPVLYS  
AFTW LGYVNSAVNPIIYTTFNIEFRK AFLKILHC

### Chimera D (TMS4)

MASLSQLSSHLNYTCGAENSTGASQA  
RPHAYYALSICALILAIVFGNGLVCM AVLKERALQTTTNY  
LVVSLAVADLLVATLVMPWVVYLEVTGGVWNFSRICCDV  
VTL DVMMCTASILNLCAISIDRYTAVVMPVHYQHGTGQSS  
CRRVALMITAVWVLAFAVSCPLL FGLNNADQNECIANPA  
FVVYSSIVSFYVPFIVTLLVYIKIYIVLRRRRKR VNTKRS  
SRAFRAHLRAPLKGNC THPE DMKLCTVIMKSN GSFVNRR  
RVEAARRAQELEM EMLSSTSPPERTRYSP IPPSHHQLTLP  
DP SHHGLHSTPD SPAKPEKNGHAKDHPKIAKIFE IQTMPN  
GKTRTSLKTMSRRKLSQQKEKKATQMLAIVLGVFI ICWLP  
FFITHILNIHCDCNIPPVLYSAFTW LGYVNSAVNPIIYTT  
FNIEFRK AFLKILHC

### Chimera E (TMS5)

MASLSQLSSHLNYTCGAENSTGASQA  
RPHAYYALSICALILAIVFGNGLVCM AVLKERALQTTTNY  
LVVSLAVADLLVATLVMPWVVYLEVTGGVWNFSRICCDVF  
VTLDVMMCTASILNLC A ISIDRYTAVVMPVHYQHGTGQSS  
CRRVALMITAVWVLAFAVSCPLLFGFNTTGDPTVCSISNP  
DFVIYSSVVSFYLPFGVTVLVYIKIYIVLRRRRKR VNTKR  
SSRAFRAHLRAPLKGNCTHPEDMKLCTVIMKSNGSFPVNR  
RRVEAARRAQELEMELSSSTSPPERTRYSPIPPSHHQLTL  
PDP SHHGLHSTPDSPAKPEKNGHAKDHPKIAKIFEIQTMP  
NGKTRTSLKTMSRRKLSQQKEKKATQMLAIIVLGVFIICWL  
PFFITHILNIHCDCNIPPVLYSAFTWLG YVNSAVNPIIYT  
TFNIEFRKAFLKILHC

### Chimera F (rtan7)

MASLSQLSSHLNYTCGAENSTGASQA  
RPHAYYALSICALILAIVFGNGLVCM AVLKERALQTTTNY  
LVVSLAVADLLVATLVMPWVVYLEVTGGVWNFSRICCDV  
FVTLDVMMCTASILNLC A ISIDRYTAVVMPVHYQHGTGQS  
SCRRVALMITAVWVLAFAVSCPLLFGFNTTGDPTVCSISNP  
DFVIYSSVVSFYLPFGVTVLVYARIYVVLKQRRRKRILTR  
QNSQCNSVRPGFPQQTLSPDPAHLELKRYYSICQDTALGG  
PGFQERGGELKREEKTRNSLSPTIAPKLSLEVRKLSNGRL  
STSLKLGPLQPRGVPLREKKATQMVAIVLGA FIVCWL PFFI  
THILNIHCDCNIPPVLYSAFTWLG YVNSAVNPIIYTTFN  
IEFRKAFLKILHC

### Chimera G (D2(D3loop))

MDPLNLSWYDDDLERQNW SRPFNGSDGKA  
DRPHYNYATLLTLLIAVIVFGNVLVCM AVSREKALQTTT  
NYLIVSLAVADLLVATLVMPWVVYLEVVGEWKFSRIHCDI  
FVTLDVMMCTASILNLC A ISIDRYTAVAMPMLYNTRYSSK  
RRVTVMISIVWVLSFTISCPLLFGFNTTGDPTVCSISNPAF  
VYSSIVSFYVPFIVTLLVYIKIYIVLRRRRKR VNTKRSS  
RAFRAHLRAPLKGNCTHPEDMKLCTVIMKSNGSFPVNR RR  
VEAARRAQELEMELSSSTSPPERTRYSPIPPSHHQLTL PD  
PSHHGLHSTPDSPAKPEKNGHAKDHPKIAKIFEIQTMPNG  
KTRTSLKTMSRRKLSQQKEKKATQMLAIIVLGVFIICWLPF  
FITHILNIHCDCNIPPVLYSAFTWLG YVNSAVNPIIYTTF  
NIEFRKAFLKILHC

### Chimera H (D3(D2loop))

MASLSQLSSHLNYTCGAENSTGASQARPHAYYALSICALI  
LAIVFGNGLVCM AVLKERALQTTTNYLVVSLAVADLLVAT  
LVMPWVVYLEVTGGVWNFSRICCDVFVTLDVMMCTASILN  
LCAISIDRYTAVVMPVHYQHGTGQSSCRRVALMITAVWVLA  
FAVSCPLLFG LNNADQNECIIANP DFVIYSSVVSFYLPFG  
VTVLVYARIYVVLKQRRRKRILTRQNSQCNSVRPGFPQQT  
LSPDPAHLELKRYYSICQDTALGGPGFQERGGELKREEK  
RNSLSPTIAPKLSLEVRKLSNGRLSTSLKLGPLQPRGVPLR  
EKKATQMVAIVLGA FIVCWL PFFLTHVLNTHCQTCHVSPE  
LYSATTWLG YVNSALNPVIYTTFNIEFRKAFLKILSC

MASLSQLSSHLYNYTCGAENSTGASQARPHAYYALSICALI  
LAIVFGNGLVCM AVLKERALQTTTNYLVVSLAVADLLVAT  
LVMPWVVYLEVTGGVWNFSRICCDVFTLDVMMCTASILN  
LCAISIDRYTAVVMPVHYQHGTGQSSCRRVALMITAVWVL  
FAVSCPLLFGFNTTGDPTVCSISNPDFVIYSSVVSFYLPFG  
VTVLVYARIYVVLKQRRRKRIILTRQNSQCNSVRPGFPQQT  
LSPDPAHLELKRYYSICQDTALGGPGFQERGGELKREEKT  
RNSLSPTIAPKLSLEVRKLSNGRLSTSLKLGPLQPRGVPLR  
EKKATQMVAIVLGAFIVCWLPFFLTHVLNTHCQTCHVSPE  
LYSATTWLG YVNSALNPVIYTTFNIEFRKAFLKILSC
